# Supplementary material for: Depletion of AADC activity in caudate nucleus and putamen of Parkinson’s disease patients; implications for ongoing AAV2-AADC gene therapy trial
Source: PubMed Central journal article supplement (PMC5293261; doi:10.1371/journal.pone.0169965), 2017-02-06
Supplement: pone.0169965.s001.pdf [file pone.0169965.s001.pdf]

**Supplemental Table 1:** AADC activity (pmol/mg protein/min) and monoamine (ng/mg protein) levels of control and PD human brain tissue.

|                                         | <b>AADC</b>  | <b>% red.</b> | <b>DA</b>    | <b>% red.</b> | <b>DOPAC</b> | <b>% red.</b> | <b>HVA</b>    | <b>% red.</b> | <b>DA:HVA</b> | <b>5-HT</b> | <b>% red.</b> | <b>5-HIAA</b> | <b>% red.</b> |
|-----------------------------------------|--------------|---------------|--------------|---------------|--------------|---------------|---------------|---------------|---------------|-------------|---------------|---------------|---------------|
| <b><i>Anterior caudate</i></b>          |              |               |              |               |              |               |               |               |               |             |               |               |               |
| PD                                      | 0.85±0.26*   |               | 5.45±2.74*** |               | 1.57±0.86**  |               | 23.63±3.68*** |               | 0.23          | 2.23±0.21** |               | 7.19±0.48*    |               |
| Controls                                | 12.06±5.56   | -93.0         | 60.83±8.71   | -91.0         | 8.42±1.95    | -81.4         | 60.74±4.28    | -61.6         | 1             | 5.58±1.01   | -60.0         | 10.44±1.33    | -31.1         |
| <b><i>Anterior dorsal putamen</i></b>   |              |               |              |               |              |               |               |               |               |             |               |               |               |
| PD                                      | 0.72±0.06*   |               | 0.71±0.41*** |               | 0.75±.65**   |               | 13.08±2.01*** |               | 0.05          | 1.95±0.34** |               | 6.93±0.89*    |               |
| Controls                                | 5.69±1.84    | -87.3         | 61.67±9.71   | -98.8         | 3.65±0.91    | -79.5         | 72.39±6.39    | -81.9         | 0.85          | 5.16±0.82   | -62.2         | 10.77±1.06    | -35.7         |
| <b><i>Anterior ventral putamen</i></b>  |              |               |              |               |              |               |               |               |               |             |               |               |               |
| PD                                      | 1.51±0.36**  |               | 3.21±1.77*** |               | 0.79±0.57*   |               | 37.34±6.61*** |               | 0.09          | 4.46±0.79   |               | 12.98±1.81    |               |
| Controls                                | 10.69±2.46   | -85.9         | 60.64±6.04   | -94.7         | 5.04±1.32    | -84.3         | 83.55±8.41    | -55.3         | 0.73          | 6.16±0.89   | -27.6         | 12.67±0.99    | 2.4           |
| <b><i>Posterior dorsal putamen</i></b>  |              |               |              |               |              |               |               |               |               |             |               |               |               |
| PD                                      | 0.82±0.11*   |               | 1.66±0.81*** |               | 0.41±0.14**  |               | 15.98±3.51*** |               | 0.1           | 3.02±0.46   |               | 14.33±2.56    |               |
| Controls                                | 5.23±1.81    | -84.3         | 74.29±12.7   | -97.8         | 4.53±1.36    | -90.9         | 55.43±5.41    | -71.2         | 1.34          | 4.54±0.77   | -33.5         | 16.32±2.75    | -12.2         |
| <b><i>Posterior ventral putamen</i></b> |              |               |              |               |              |               |               |               |               |             |               |               |               |
| PD                                      | 0.67±0.06*** |               | 1.43±0.71*** |               | 0.45±0.23*   |               | 18.01±5.16*** |               | 0.08          | 4.33±1.86   |               | 14.52±2.41    |               |
| Controls                                | 7.01±1.49    | -90.4         | 94.62±13.62  | -98.5         | 5.93±2.07    | -92.4         | 77.59±10.9    | -76.8         | 1.22          | 7.39±0.73   | -41.4         | 19.62±1.72    | -26.0         |

Data are expressed as mean ± SEM.

% red.: percentage of reduction of the analyte in the PD patients compared with the healthy controls

Unpaired, two-tailed t-test: \* p ≤ 0.05; \*\* p ≤ 0.01; \*\*\* p ≤ 0.001 – compared to healthy controls
